# Supplementary material for: Transformative insights from transcriptome analysis of colorectal cancer patient tissues: identification of four key prognostic genes
Source: PeerJ journal article supplement (doi:10.7717/peerj.19852), 2025-08-20
Supplement: Belder_et_al_Supplementary_figures.pdf [file Belder_et_al_Supplementary_figures.pdf]

## Supplementary Figures

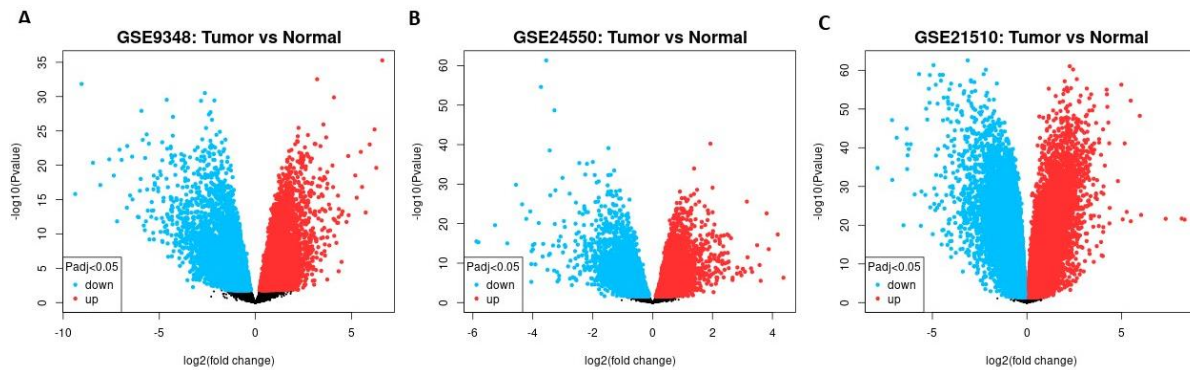

**Supplementary Figure 1:** Differential expressed genes between colorectal cancer and normal samples in three independent datasets. DEGs were displayed by volcano plots in (A) GSE9348, (B) GSE24550, and (C) GSE21510. Each dot represents a gene, with red indicating up-regulated genes, blue indicating down-regulated genes, and black indicating genes with no significance.

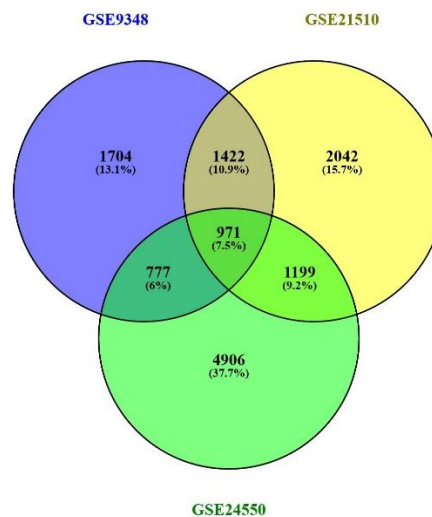

**Supplementary Figure 2:** Common differential expressed genes in three datasets from the integrated microarray dataset analysis.

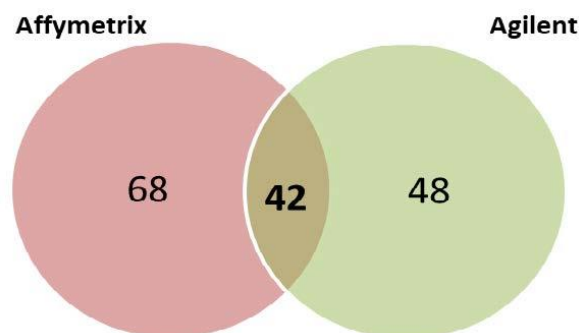

**Supplementary Figure 3:** Common differential expressed miRNAs in the datasets from the Affymetrix and Agilent microarray platforms.
